# Supplementary material for: Enantiopure titanocene complexes – direct evidence for paraptosis in cancer cells
Source: Royal Society of Chemistry journal article supplement (doi:10.1039/c5mt00297d), 2016-01-01
Supplement: c5mt00297d2.xlsx [file c5mt00297d2.xlsx]

## Sheet: Sheet1
SW Calcs. On ICPMS data
Sample	Na	Mg	P	S	K	Ca	Ti		Sample	Na	Mg	P	S	K	Ca	Ti
Label	(mg/L)	(mg/L)	(mg/L)	(mg/L)	(mg/L)	(mg/L)	(µg/L)		Label	(M)	(M)	(M)	(M)	(M)	(M)	(M)
B1	0.0160358	0.00447842	0.00348054	0.775197	-0.115178	0.0326894	0.273872		B1	6.9752e-07	1.84259e-07	1.12371e-07	2.41758e-05	-2.94587e-06	8.15645e-07	5.72151e-09
B2	0.0015193	0.00294222	0.00253914	0.810964	-0.123619	0.0340196	0.170302		B2	6.60859e-08	1.21054e-07	8.19771e-08	2.52913e-05	-3.16174e-06	8.48834e-07	3.55782e-09
B3	-0.00131319	0.00214628	-0.000458641	0.785452	-0.12884	0.0174018	0.129179		B3	-5.71206e-08	8.83059e-08	-1.48074e-08	2.44956e-05	-3.29529e-06	4.34198e-07	2.69871e-09
B4	0.00213509	0.00386546	0.00593901	0.754882	-0.125883	0.0398836	0.245814		B4	9.2871e-08	1.5904e-07	1.91743e-07	2.35422e-05	-3.21965e-06	9.9515e-07	5.13536e-09
1	5.08243	0.0317578	0.61414	0.737545	0.471283	0.0560448	0.289925		1	0.000221073	1.30664e-06	1.98277e-05	2.30015e-05	1.20538e-05	1.39839e-06	6.0569e-09
2 1/10	3316.41	4.16582	225.355	37.6325	178.274	10.6634	8.78069		2 1/10	0.144256	0.000171398	0.00727567	0.00117363	0.00455963	0.000266066	1.83439e-07
2 1/100	3120.65	4.39001	191.09	59.3769	161.187	11.3419	38.0966		2 1/100	0.135741	0.000180622	0.0061694	0.00185177	0.0041226	0.000282995	7.95885e-07
3	5.34237	0.0359929	0.764081	0.620966	0.650619	0.0459385	6.15872		3	0.00023238	1.48088e-06	2.46687e-05	1.93659e-05	1.66406e-05	1.14623e-06	1.28663e-07					Calculated mols Ti TOTAL
4 1/10	3378.88	4.35842	222.978	611.915	180.701	10.9422	544.243		4 1/10	0.146973	0.000179322	0.00719894	0.0190836	0.0046217	0.000273022	1.13699e-05			1.70549e-07		1.5e-07
4 1/100	3056.64	4.48978	194.083	596.567	156.099	10.9535	534.349		4 1/100	0.132956	0.000184726	0.00626604	0.0186049	0.00399247	0.000273305	1.11632e-05			1.67448e-07		1.5e-07
Explanation of samples - note that ALL dilution factors have already been implemented in the ICPMS software.									TOTAL MOLS Ti IN ALL CELLS (5.8E+05) in Sample 1 (control):					9.08535e-11
*Blanks and Cells digestions: 3mL (16% HNO3) - 2h 95˚C - diluted with MilliQ water up to a volume of 15mL									TOTAL CELLS IN SAMPLE:					260000
									AVERAGE Ti PER CELL					3.49436e-16		0.349436	femtomol
B1-B4: Blanks (DF 1)
- 1: *Control Cells (DF 1)									TOTAL MOLS Ti IN ALL CELLS (5.8E+05) in Sample 3 (treated):					1.92995e-09
- 2 1/10: 10 times diluted control medium (DF 10)									TOTAL CELLS IN SAMPLE:					580000
- 2 1/100: 100 times diluted control medium (DF 100)									AVERAGE Ti PER CELL					3.32749e-15		3.32749	femtomol
- 3: *30uM Ti Cells (DF 1)
- 4 1/10: 10 times diluted 30uM Ti medium (DF 10)
- 4 1/100: 100 times diluted 30uM Ti medium (DF 100)									Average mass of TiO2 in a cell (max in 'Sadler model'):					2.65754e-13	g
	TOTAL FINAL VOLUME ALL SAMPLES 15 mL
									Average volume TiO2 in a cell:					6.28259e-14	cm3
	calculated masses per million cells				ng				Average volume TiO2 in a cell:					6.28259e-20	m3
	4.34888e-09	g for 2.6E+05 cells		1.67265e-08	16.7265				Estimated size of TiO2 particles in one cell by number….
	9.23807e-08	g for 2.6E+05 cells		1.59277e-07	159.277				Hypothetical single solid 'cube' TiO2 of maximum dimensions:					3.98125e-07	m
									Hypothetical dimentions of 1000 TiO2 cubes:					3.98217e-08	m
									Hypothetical dimentions of 10000 TiO2 cubes:					1.8485e-08	m
									Hypothetical dimentions of 100000 TiO2 cubes:					8.58064e-09	m
									Hypothetical dimentions of 1000000 TiO2 cubes:					3.98309e-09	m
									Hypothetical dimentions of 10000000 TiO2 cubes:					1.84893e-09	m
									Hypothetical dimentions of 10000000 TiO2 cubes:					8.58262e-10	m
									Hypothetical dimentions of 1x 10^11 TiO2 cubes:					8.58459e-11	m
