# Supplementary material for: Enantiopure titanocene complexes – direct evidence for paraptosis in cancer cells
Source: Royal Society of Chemistry journal article supplement (doi:10.1039/c5mt00297d), 2016-01-01
Supplement: c5mt00297d3.xlsx [file c5mt00297d3.xlsx]

## Sheet: 1%DMSO-RR-6.52ppm data
Dissolution of (R,R)-4 modeled as two concecutive first order reactions with equilibria
Notes
	The data modelled were the concentration of I as measured by the integrated intensity of the CpR signal at 6.52 ppm vs an internal standard
	The equations for solution of two consecutive equilibrating first order reactions are standard [Moore, J. W., Pearson, R. G., Kinetics and Mechanism, 3rd Ed. Wiley-Interscience, New York (1981)]
	The data were fitted using the 'Solver' procedure of Billo [Billo, E. J., Excel for Chemists: A Comprehensive Guide, 3rd Ed. John Wiley & Sons, Inc., New York (2011)]
	Attempts to fit other models, including second order behaviour, single or consecutive non equilibrating first order reactions led to poorer fits (R2 0.90-0.93) below the threshold normally taken to indicate mechanistic confidence (0.99)
	The largest source of error is the replacement of the stepwise chloride hydrolysis by a composite event modelled by k1, but this cannot be avoided as A-C cannot be individually distinguished and the events are too rapid for NMR measurement
	Samples containing (S,S)-4 and rac/meso diastereomers gave equivalent rates within the error bars estimated statistically (Solver Stats)
										Model
Derived rates and initial concentration					Parameters
k1		0.0156038			p	0.0311673
k2		0			q	4.04063e-05		0.000242849
k3		0.0149975			lm2	0.0156038
k4		0.000565927			lm3	0.0155634
[A]0		197.925
						Quality of fit (R2) is….	0.983
t(1/2)		around 100 min
Data in this highlight is fitted
					Factors….
Time min	Tmod min	[I]obs	[I]calc	delta^2	k1k4/lm2lm3	k1(k4-lm2)/lm2(lm2-lm3)	e(-lm2t)	k1(lm3-k4)/lm3(lm2-lm3)	e(-lm3t)
0		3.1	Induction period not modelled
24		4.51	Induction period not modelled
47		9.62	Induction period not modelled
71	-2e-05	9.31	-6.17679e-05	86.6773	0.0363626	-372.168	1	372.132	1
95	24	40.62	51.3873	115.935	0.0363626	-372.168	0.687639	372.132	0.688306
118	47	74.68	70.9845	13.6569	0.0363626	-372.168	0.480283	372.132	0.481195
142	71	79.3	74.7053	21.1111	0.0363626	-372.168	0.330261	372.132	0.33121
166	95	72.96	69.8937	9.40208	0.0363626	-372.168	0.2271	372.132	0.227973
189	118	63.03	61.892	1.29509	0.0363626	-372.168	0.158619	372.132	0.159377
213	142	50.99	52.639	2.71933	0.0363626	-372.168	0.109072	372.132	0.1097
237	166	41.09	43.8353	7.53656	0.0363626	-372.168	0.0750022	372.132	0.075507
260	189	33.57	36.3987	8.00168	0.0363626	-372.168	0.0523855	372.132	0.0527871
284	213	27.47	29.8712	5.76561	0.0363626	-372.168	0.0360223	372.132	0.0363336
308	237	24.02	24.5741	0.306982	0.0363626	-372.168	0.0247703	372.132	0.0250087
331	260	20.72	20.5303	0.0360003	0.0363626	-372.168	0.0173009	372.132	0.0174836
355	284	16.77	17.2246	0.206676	0.0363626	-372.168	0.0118967	372.132	0.012034
379	308	14.99	14.6837	0.0937944	0.0363626	-372.168	0.00818066	372.132	0.0082831
402	331	14.24	12.8223	2.00974	0.0363626	-372.168	0.0057138	372.132	0.00579073
426	355	12.52	11.3498	1.36941	0.0363626	-372.168	0.00392903	372.132	0.00398579		Solver stats
450	379	11.77	10.2485	2.31498	0.0363626	-372.168	0.00270175	372.132	0.00274344
473	402	9.82	9.45957	0.129911	0.0363626	-372.168	0.00188704	372.132	0.00191795		0.0156038	0.0149975	0.000565927	197.925
497	426	10.61	8.8471	3.10783	0.0363626	-372.168	0.0012976	372.132	0.00132013		0.606154	0.604245	6.48415e-05	7679.96
521	450	10.2	8.39656	3.25238	0.0363626	-372.168	0.000892283	372.132	0.000908655		0.98309	2.82789
544	473	8.86	8.07832	0.611019	0.0363626	-372.168	0.000623217	372.132	0.000635242
568	497	8.52	7.83427	0.470226	0.0363626	-372.168	0.000428548	372.132	0.000437241
592	521	8.54	7.65672	0.780183	0.0363626	-372.168	0.000294686	372.132	0.000300955
616	545	7.91	7.52793	0.145976	0.0363626	-372.168	0.000202637	372.132	0.000207149
639	568	8.45	7.43807	1.024	0.0363626	-372.168	0.000141533	372.132	0.000144818
663	592	7.54	7.36991	0.0289307	0.0363626	-372.168	9.73232e-05	372.132	9.96793e-05
687	616	7.12	7.32082	0.0403289	0.0363626	-372.168	6.69232e-05	372.132	6.86098e-05
710	639	7.08	7.28679	0.0427609	0.0363626	-372.168	4.67428e-05	372.132	4.79654e-05
734	663	7.01	7.26112	0.0630619	0.0363626	-372.168	3.21421e-05	372.132	3.30148e-05
758	687	7.21	7.24274	0.00107176	0.0363626	-372.168	2.21022e-05	372.132	2.27243e-05
781	710	6.01	7.23005	1.48853	0.0363626	-372.168	1.54372e-05	372.132	1.58865e-05
805	734	6.96	7.22053	0.0678778	0.0363626	-372.168	1.06152e-05	372.132	1.09348e-05
829	758	6.91	7.21374	0.0922599	0.0363626	-372.168	7.29943e-06	372.132	7.52646e-06
852	781	7.07	7.20908	0.0193423	0.0363626	-372.168	5.09832e-06	372.132	5.26178e-06
876	805	6.78	7.20559	0.181124	0.0363626	-372.168	3.5058e-06	372.132	3.62171e-06
900	829	6.93	7.20311	0.0745865	0.0363626	-372.168	2.41072e-06	372.132	2.49284e-06
923	852	7.63	7.20141	0.183693	0.0363626	-372.168	1.68378e-06	372.132	1.74276e-06
947	876	5.88	7.20014	1.74277	0.0363626	-372.168	1.15783e-06	372.132	1.19955e-06
971	900	5.75	7.19924	2.1003	0.0363626	-372.168	7.9617e-07	372.132	8.25657e-07
994	923	5.92	7.19863	1.63489	0.0363626	-372.168	5.56084e-07	372.132	5.77214e-07
1018	947	6.79	7.19817	0.166603	0.0363626	-372.168	3.82384e-07	372.132	3.973e-07
1042	971	5.97	Greater than 20 half lives (from simple first order fit of decay) from [I]max not modelled
				295.888	Sum of squares (residual error)
